# Supplementary material
Source: MDPI journal article supplement (https://www.mdpi.com/2073-4433/12/7/832)
Supplement: s1 [file s1]

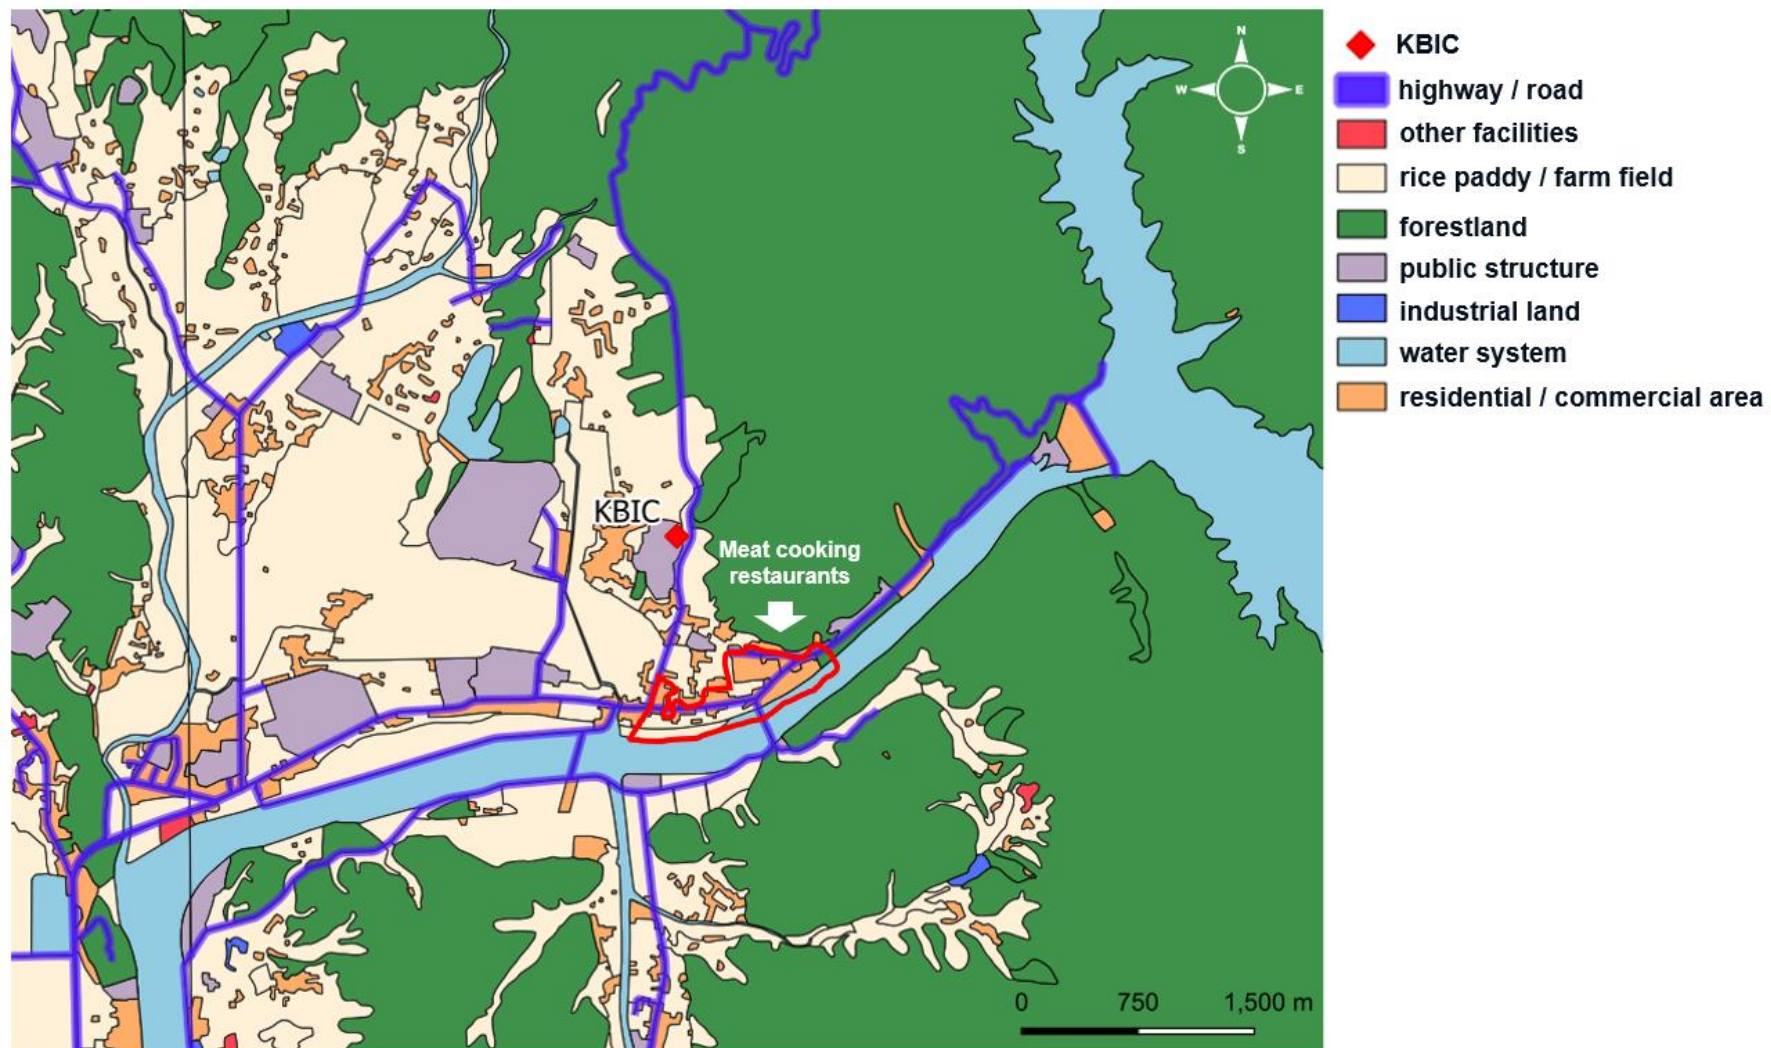

Figure S1. The detailed land use information around the KBIC site.

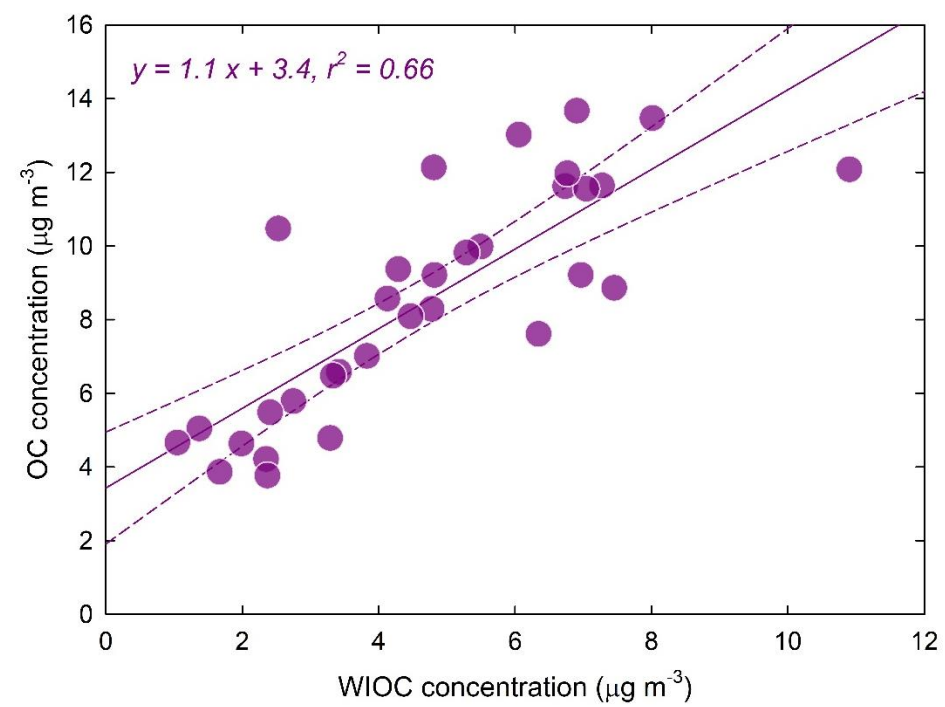

**Figure S2.** Linear regression between WIOC and OC concentrations at the KNU site.

**Table S1.** Size-segregated mass concentrations ( $\mu\text{g m}^{-3}$ ) of PM using MOUDI at the KNU site in a previous study (Kim, 2017).

| Date         | PM <sub>0.18</sub> | PM <sub>0.18-0.32</sub> | PM <sub>0.32-0.56</sub> | PM <sub>0.56-1.0</sub> | PM <sub>1.0-1.8</sub> | PM <sub>1.8-3.2</sub> | PM <sub>3.2-5.6</sub> | PM <sub>5.6-10</sub> | PM <sub>0.32</sub> | PM <sub>0.32-10</sub> | PM <sub>0.32</sub> /PM <sub>0.32-10</sub> |
|--------------|--------------------|-------------------------|-------------------------|------------------------|-----------------------|-----------------------|-----------------------|----------------------|--------------------|-----------------------|-------------------------------------------|
| Sep.05, 2011 | 2.47               | 3.84                    | 12.0                    | 7.76                   | 5.60                  | 5.68                  | 6.11                  | 5.72                 | 6.31               | 42.9                  | 0.15                                      |
| Sep.09, 2011 | 1.76               | 0.74                    | 1.17                    | 0.39                   | 1.02                  | 0.74                  | 0.43                  | 0.90                 | 2.50               | 4.65                  | 0.54                                      |
| Sep.17, 2011 | 1.60               | 1.51                    | 3.52                    | 0.53                   | 1.02                  | 0.49                  | 1.02                  | 0.25                 | 3.11               | 6.83                  | 0.46                                      |
| Sep.20, 2011 | 2.86               | 2.00                    | 6.95                    | 4.46                   | 3.76                  | 3.31                  | 4.46                  | 3.39                 | 4.87               | 26.3                  | 0.18                                      |
| Sep.23, 2011 | 3.10               | 2.98                    | 13.6                    | 11.8                   | 7.56                  | 3.50                  | 17.2                  | 6.31                 | 6.07               | 60.0                  | 0.10                                      |
| Sep.02, 2012 | 2.90               | 5.35                    | 11.5                    | 10.8                   | 13.3                  | 3.43                  | 3.11                  | 2.74                 | 8.26               | 44.8                  | 0.18                                      |
| Sep.05, 2012 | 2.07               | 3.56                    | 4.10                    | 4.26                   | 1.90                  | 1.28                  | 2.28                  | 3.29                 | 5.63               | 17.1                  | 0.33                                      |
| Sep.08, 2012 | 4.85               | 6.22                    | 10.7                    | 6.09                   | 6.13                  | 2.94                  | 5.68                  | 4.23                 | 11.1               | 35.7                  | 0.31                                      |
| Sep.17, 2012 | 3.40               | 1.59                    | 3.06                    | 1.97                   | 2.85                  | 3.82                  | 4.02                  | 3.19                 | 4.99               | 18.9                  | 0.26                                      |
| Sep.20, 2012 | 1.25               | 1.13                    | 4.22                    | 2.17                   | 3.14                  | 6.77                  | 9.12                  | 7.53                 | 2.38               | 33.0                  | 0.07                                      |

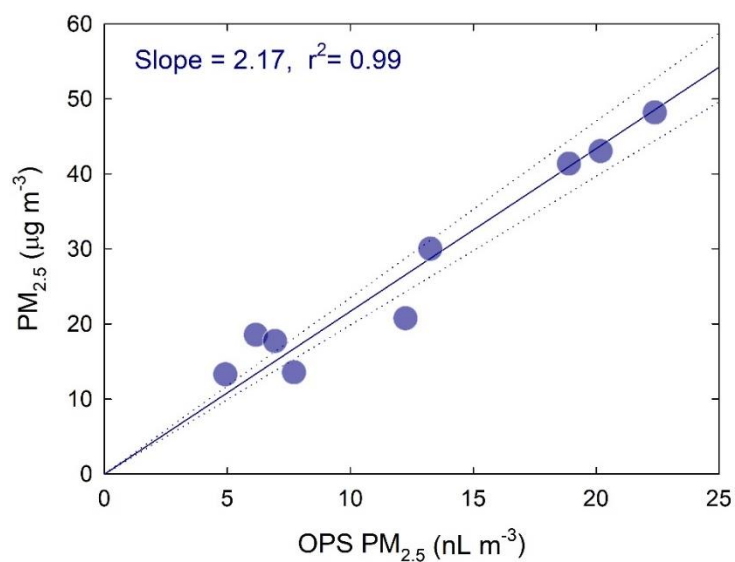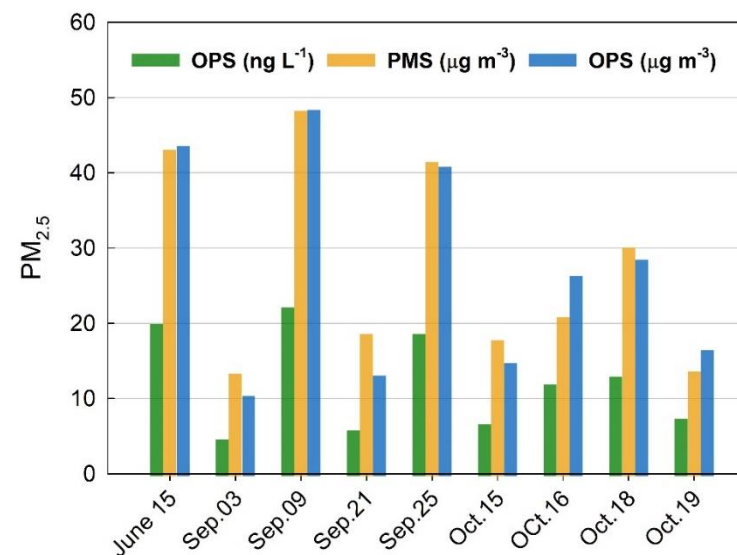

**Figure S3.** Correlation between OPS PM<sub>2.5</sub> volume concentration and PM<sub>2.5</sub> mass concentration measured by gravimetric method (left) and comparison of PM<sub>2.5</sub> volume concentration (ng L<sup>-1</sup>) by OPS (green bar), PM<sub>2.5</sub> mass concentration ( $\mu\text{g m}^{-3}$ ) measured by a gravimetric method using PMS instrument (yellow bar), and PM<sub>2.5</sub> mass

concentration ( $\mu\text{g m}^{-3}$ ) estimated by OPS volume concentration multiplied by particle density of  $2.17 \text{ g cm}^{-3}$  (blue bar).

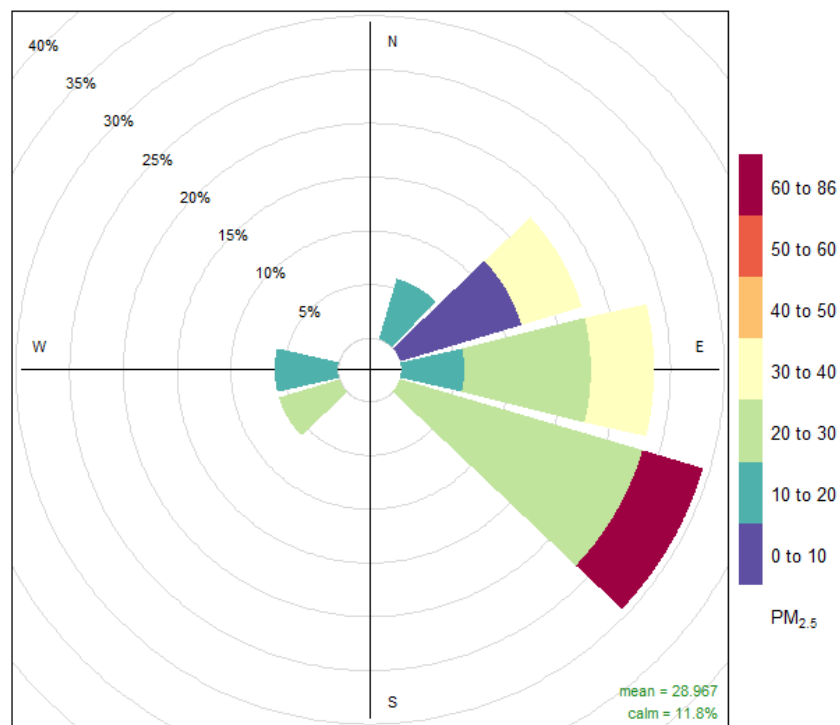

Frequency of counts by wind direction (%)

Figure S4. Pollution rise of PM<sub>2.5</sub> at the KBIC site.
